# Supplementary material
Source: PubMed Central journal article supplement (PMC4789853)

**Supplementary figure A: Personal homepage**  
(Name is fictitious and picture is of one of the authors)

## My Home Page

UMC Utrecht and Rijnstate Hospital

Welcome mister Jansen. Your nurse practitioner is Anne de Vries.  
Last time you used the website at November 7<sup>th</sup> 17:00<sup>h</sup>

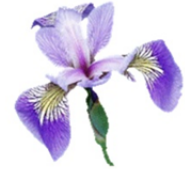

### My medication

|                     | dose   | frequency                 |                     |
|---------------------|--------|---------------------------|---------------------|
| carbasalaat calcium | 100 mg | once daily                | blood clotting      |
| ramipril            | 5 mg   | once daily                | high blood pressure |
| Simvastatin         | 20 mg  | once daily in the evening | high cholesterol    |

Report changes to your nurse practitioner Anne de Vries

### My risk factors

optimal      almost at goal...      not under control

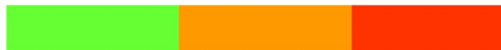

Blood pressure

Cholesterol

Blood sugar

Body weight

Smoking

Exercise

### My nurse practitioner

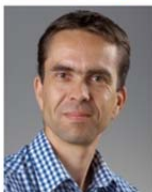

Your nurse practitioner is Anne de Vries

## Supplementary figure B: Personal risk factor page of smoking

# UMC Utrecht and Rijnstate Hospital

Welcome mister Jansen. Your nurse practitioner is Anne de Vries.  
Last time you used the website at November 7<sup>th</sup> 17:00<sup>h</sup>

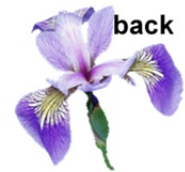

## Smoking

Messages for this risk factor

[New message](#)

[Overview messages](#)

## My appointments

| Date       | Appointments   |
|------------|----------------|
| 15-07-2011 | Plan stop day  |
| 07-11-2011 | Plan stop date |

## My measurements

[New measurement](#)

[Print measurements](#)

optimal

almost at  
goal...

not under  
control

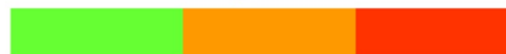

|        | Start      | <<         | Last four measurements |            |            | >>         | My goal | Normal |
|--------|------------|------------|------------------------|------------|------------|------------|---------|--------|
| Date   | 15-05-2011 | 11-06-2011 | 12-07-2011             | 01-10-2011 | 07-11-2011 | 01-01-2012 |         |        |
| Amount | 4          | 20         | 1                      | 6          | 3          | 0          | 0       |        |
|        | Per day    | Per week   | Per day                | Per week   | Per week   | Per day    | Per day |        |

## Websites for this risk factor

|                                                                                  |         |
|----------------------------------------------------------------------------------|---------|
| <a href="http://www.stivoro.nl">www.stivoro.nl</a>                               | Smoking |
| <a href="http://www.hulpbijstoppenmetroken.nl">www.hulpbijstoppenmetroken.nl</a> | Smoking |
| <a href="http://www.ikstop.nl">www.ikstop.nl</a>                                 | smoking |

**Supplementary figure C: Website use by patients per study month**

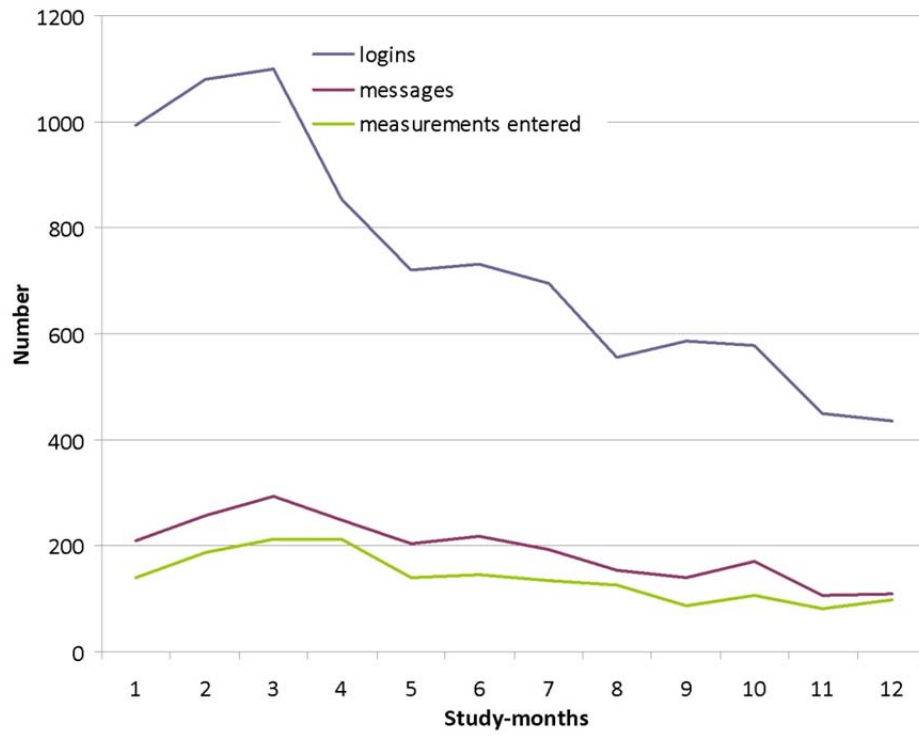

Supplement: verj002374.ww2_default.pdf [file verj002374.ww2_default.pdf]
