# Supplementary material
Source: PubMed Central journal article supplement (PMC4789853)
Supplement: verj002374.ww1_default.pdf [file verj002374.ww1_default.pdf]

**Supplementary table A: Baseline characteristics of non-randomized patients versus randomized patients**

|                                       | Non-randomized<br>(n=308) | Randomized<br>(n=330) |
|---------------------------------------|---------------------------|-----------------------|
| Age (years), mean (SD)                | 62.1 (10.7)               | 59.9 (8.4)            |
| Male gender, n (%)                    | 205 (67)                  | 246 (75)              |
| BMI (kg/m <sup>2</sup> ), mean (SD)   | 27.6 (4.6)                | 27.8 (4.0)            |
| Total cholesterol (mmol/l), mean (SD) | 4.8 (1.1)                 | 4.7 (1.0)             |
| Glucose (mmol/l), mean (SD)           | 6.2 (1.4)                 | 6.3 (1.5)             |
| SBP (mmHg), mean (SD)                 | 142 (20)                  | 140 (18)              |
| Type 2 diabetes mellitus, n (%)       | 64 (21)                   | 77 (23)               |
| Current smoking, n (%)                | 99 (32)                   | 87 (26)               |
| Diagnosis at inclusion, n (%)         |                           |                       |
| Coronary artery disease               | 125 (41)                  | 144 (44)              |
| Cerebral vascular disease             | 80 (26)                   | 95 (29)               |
| AAA                                   | 13 (4)                    | 15 (5)                |
| Peripheral vascular disease           | 78 (25)                   | 76 (23)               |
| Medical history, n (%)                |                           |                       |
| Coronary artery disease               | 147 (48)                  | 163 (49)              |
| Cerebral vascular disease             | 73 (24)                   | 91 (28)               |
| AAA                                   | 20 (7)                    | 8 (2)                 |
| Peripheral vascular disease           | 44 (14)                   | 49 (15)               |

SD indicates standard deviation, BMI: body mass index, SBP: systolic blood pressure, AAA: abdominal aortic aneurysm

**Supplementary table B: Website use by patients**

| Intervention group n=155                           | No. of patients | n per patient |
|----------------------------------------------------|-----------------|---------------|
| Logins, median [interquartile range]               | 152             | 56 [35 to 83] |
| Messages sent, median [interquartile range]        | 134             | 14 [7 to 22]  |
| Measurements entered, median [interquartile range] | 131             | 7 [3 to 14]   |
| Blood pressure                                     | 111             | 3 [2 to 6]    |
| Lipids                                             | 41              | 1 [1 to 2]    |
| Glucose                                            | 35              | 1 [1 to 3]    |
| Weight                                             | 114             | 3 [1 to 6]    |
| Smoking                                            | 27              | 1 [1 to 4]    |
| Exercise                                           | 48              | 2 [1 to 3]    |

Number of patients actually using the internet program and use of the internet program by these patients

**Supplementary table C: Intervention result stratified by website use patients**

|                                            | tertiles of logins |                     |                     |
|--------------------------------------------|--------------------|---------------------|---------------------|
|                                            | 1                  | 2                   | 3                   |
|                                            | <i>(n=51)</i>      | <i>(n=52)</i>       | <i>(n=52)</i>       |
| Logins, mean (SD)                          | 21.7 (12.1)        | 54.0 (8.7)          | 96.5 (20.9)         |
| Range                                      | 0-38               | 39-68               | 69-166              |
| Messages sent, mean (SD)                   | 4.0 (4.3)          | 12.9 (7.6)          | 26.8 (14.0)         |
| Measurements, mean (SD)                    | 4.3 (5.5)          | 6.4 (5.3)           | 21.4 (28.2)         |
| Age (years), mean (SD)                     | 58.6 (8.3)         | 61.6 (6.9)          | 62.1 (8.1)          |
| Male gender, n (%)                         | 38 (75)            | 40 (77)             | 43 (83)             |
| BMI (kg/m <sup>2</sup> ), mean (SD)        | 27.5 (4.1)         | 28.4 (3.6)          | 28.6 (4.8)          |
| LDL-cholesterol (mmol/l), mean (SD)        | 2.8 (1.0)          | 2.7 (0.7)           | 2.8 (1.0)           |
| SBP (mmHg), mean (SD)                      | 135 (17)           | 140 (14)            | 144 (21)            |
| Current smoking, n (%)                     | 34 (67)            | 39 (75)             | 40 (77)             |
| FHR, mean (SD)                             | 14.1 (9.1)         | 16.5 (11.6)         | 17.6 (10.7)         |
| Change in FHR during intervention, (95%CI) | -1.4 (-3.6 to 0.8) | -3.3 (-5.4 to -1.1) | -3.8 (-6.3 to -1.3) |

SD indicates standard deviation, BMI: body mass index, LDL-cholesterol: low-density lipoprotein cholesterol, SBP: systolic blood pressure, FHR: Framingham Heart Risk score
